# Supplementary material for: Rare Case Studies of Bilateral and Symmetric Sacroiliac Disease
Source: Hindawi journal article supplement (doi:10.1155/2024/8893089), 2024-01-01

# Rare Case Studies

Bilateral And Symmetric Sacroiliac Disease

Ap Sacroiliac Image #1 Bilateral SIJ Disease

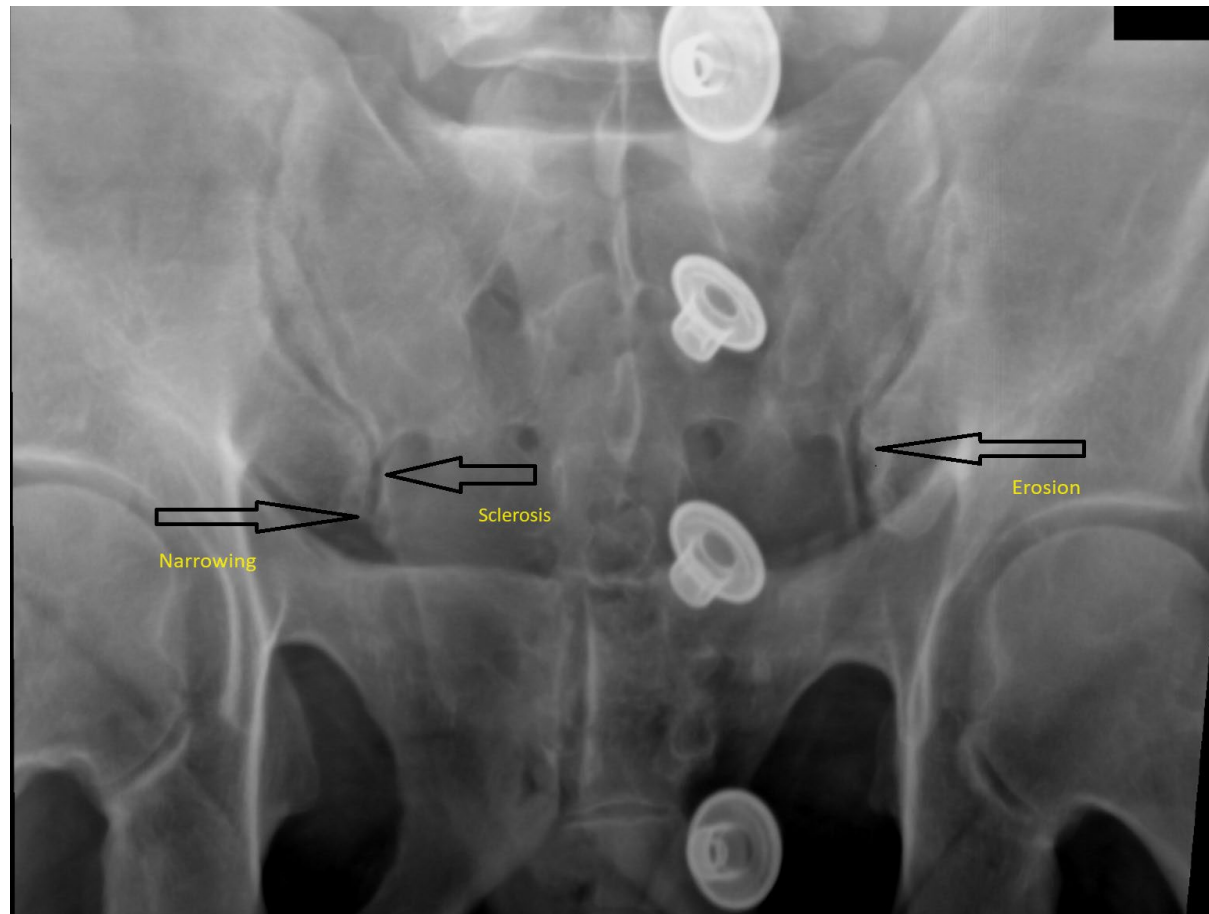

AP Sacroiliac Image #2 with sclerosis along interior, inferior iliac margins bilaterally

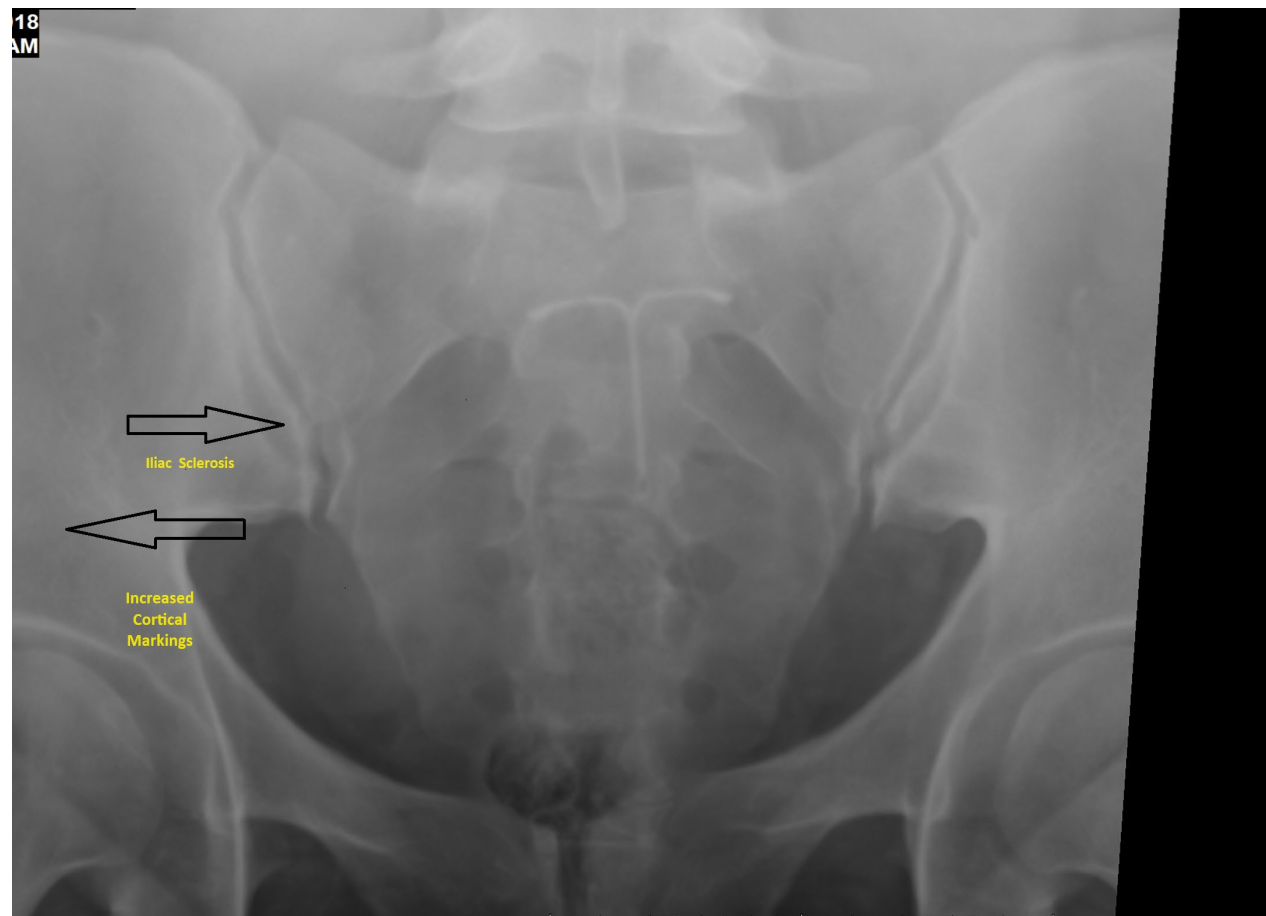

AP Sacroiliac Image #3 –Bilateral Iliac Sclerosis with narrowing, marrow edema on MRI

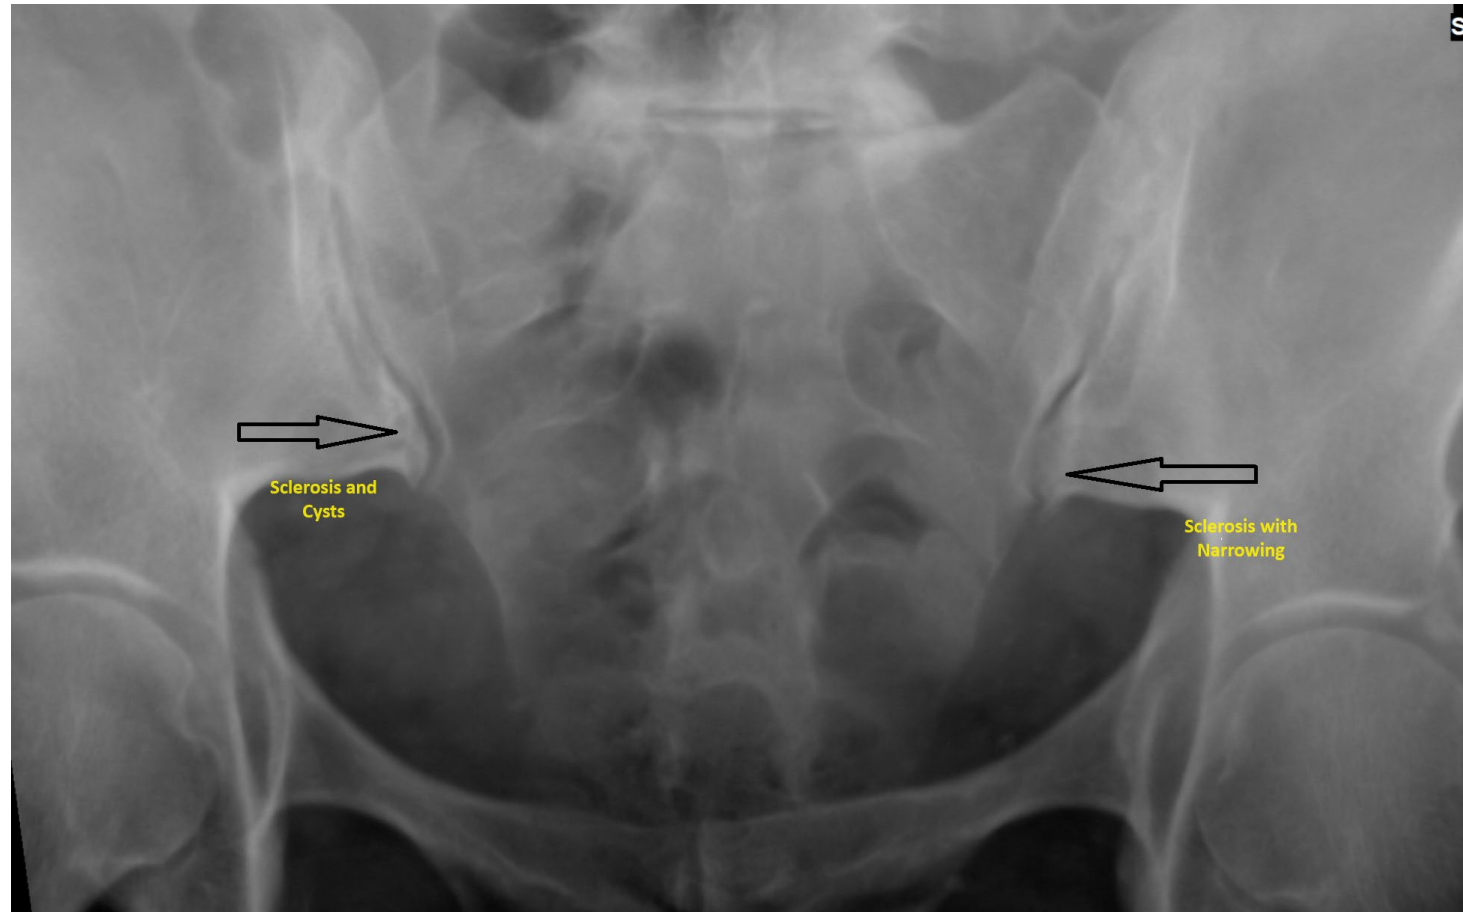

Supplement: f1 [file 8893089.f1.pdf]
